# Supplementary material for: Efficient Degradation of Sulfamethoxazole by Diatomite-Supported Hydroxyl-Modified UIO-66 Photocatalyst after Calcination
Source: MDPI journal article supplement (doi:10.3390/nano13243116), 2023-12-11
Supplement: s1 [file s1]

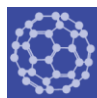

# Efficient Degradation of Sulfamethoxazole by Diatomite-Supported Hydroxyl-Modified UIO-66 Photocatalyst after Calcination

Hui-Lai Liu <sup>1,2</sup>, Yu Zhang <sup>1,2</sup>, Xin-Xin Lv <sup>1,2</sup>, Min-Shu Cui <sup>1</sup>, Kang-Ping Cui <sup>1</sup>, Zheng-Liang Dai <sup>3</sup>, Bei Wang <sup>3</sup>, Rohan Weerasooriya <sup>2,4</sup> and Xing Chen <sup>1,2,4,\*</sup>

<sup>1</sup> Key Laboratory of Nanominerals and Pollution Control of Higher Education Institutes, School of Resources and Environmental Engineering, Hefei University of Technology, Hefei 230009, China; 18255110208@163.com (H.-L.L.); 18691965261@163.com (Y.Z.); lvx1996@163.com (X.-X.L.); mcui@mail.ustc.edu.cn (M.-S.C.); cui kangping@hfut.edu.cn (K.-P.C.)

<sup>2</sup> Key Lab of Aerospace Structural Parts Forming Technology and Equipment of Anhui Province, Institute of Industry and Equipment Technology, Hefei University of Technology, Hefei 230009, China; rohan.we@nifs.ac.lk

<sup>3</sup> Anqing Changhong Chemical Co., Ltd., Anqing 246002, China; 18256240803@163.com (Z.-L.D.); 13855694589@163.com (B.W.)

<sup>4</sup> National Centre for Water Quality Research, National Institute of Fundamental Studies, Hantana, Kandy, Sri Lanka; rohan.we@nifs.ac.lk

\* Correspondence: xingchen@hfut.edu.cn

## Photoelectrochemical measurements

The photocurrent measurements were carried out on a CHI-760E electrochemical workstation (Chenhua Instrument, Shanghai, China) in a conventional three-electrode configuration with the sample modified ATO (20 mm \* 50 mm) as the working electrode, Pt as the counter electrode, and Ag/AgCl as the reference electrode. The current measurement *i*-*t* curve was performed using an LED lamp (35 W) at 0.4 V bias voltage potential. An aqueous solution of 0.5 M Na<sub>2</sub>SO<sub>4</sub> was used as the electrolyte.

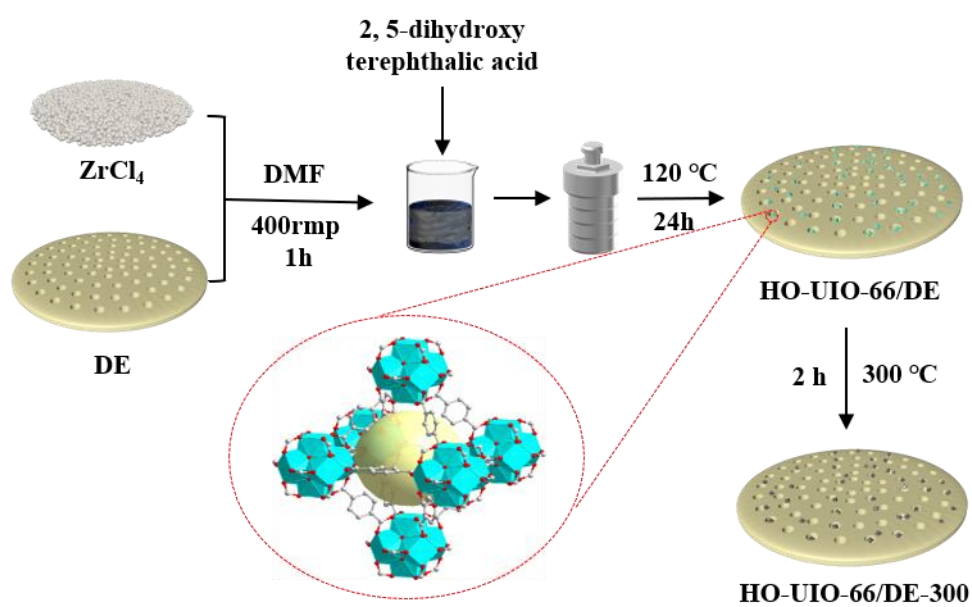

**Figure S1.** Schematic of the synthesis process of HO-UIO-66/DE-300.

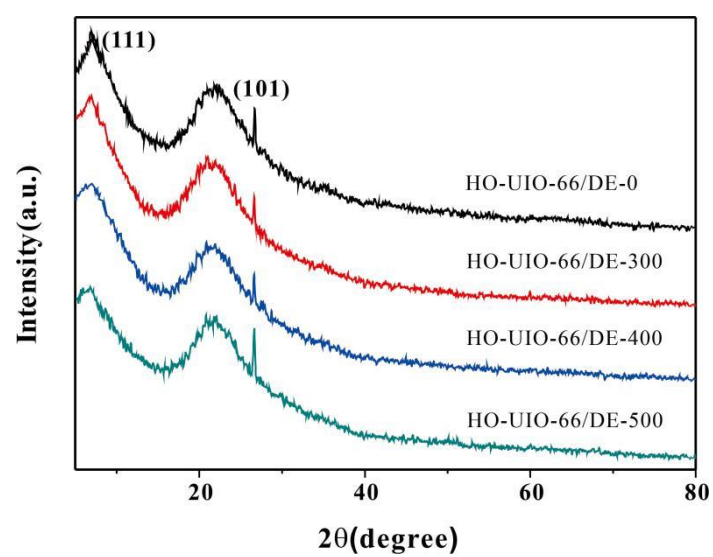

**Figure S2.** The XRD patterns of synthesized photocatalysts.

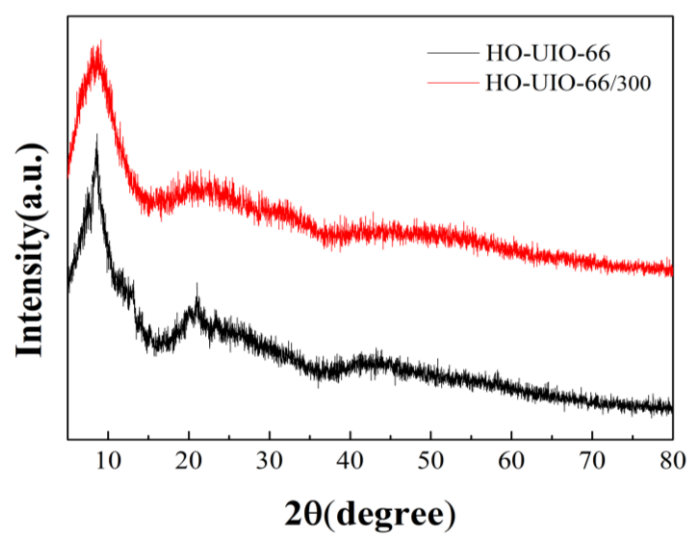

**Figure S3.** The XRD patterns of HO-UIO-66 and HO-UIO-66/300.

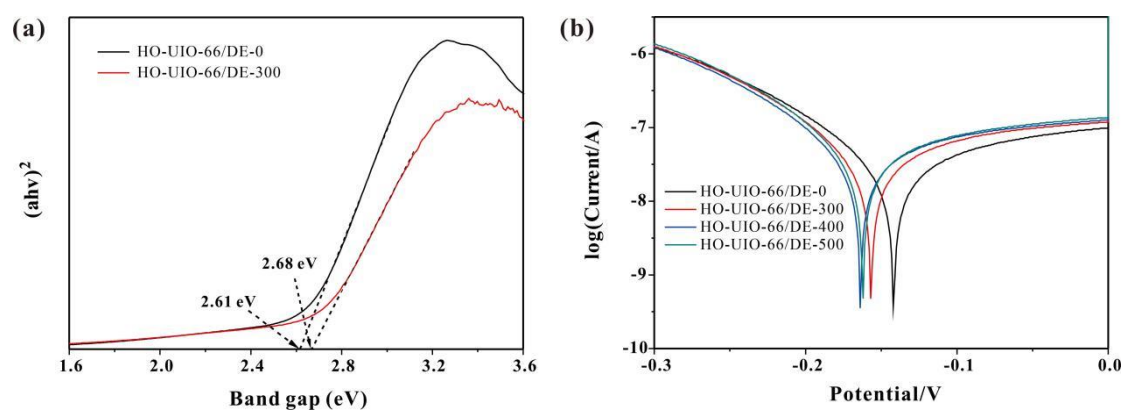

**Figure S4.** (a) Tauc plots of as-prepared catalysts and (b) Tafel polarization curves.

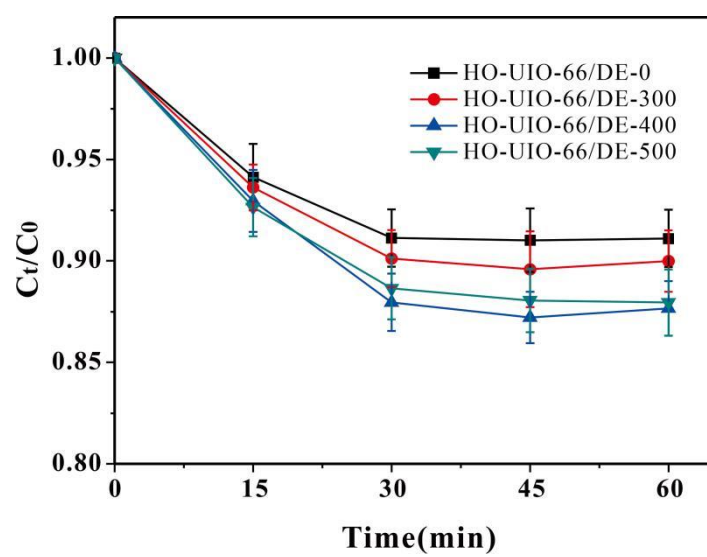

**Figure S5.** The effect of different catalysts on SMX adsorption performance (reaction conditions: initial SMX, 20.0 mg/L; catalyst, 400 mg/L).

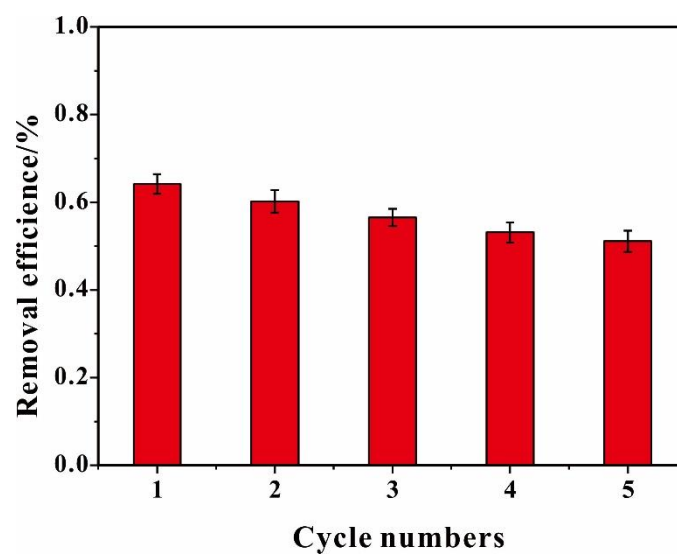

**Figure S6.** Removal efficiency of TOC (reaction conditions: pH 3.0; initial SMX, 20.0 mg/L; catalyst, 400 mg/L; H<sub>2</sub>O<sub>2</sub>, 4.0 mM).

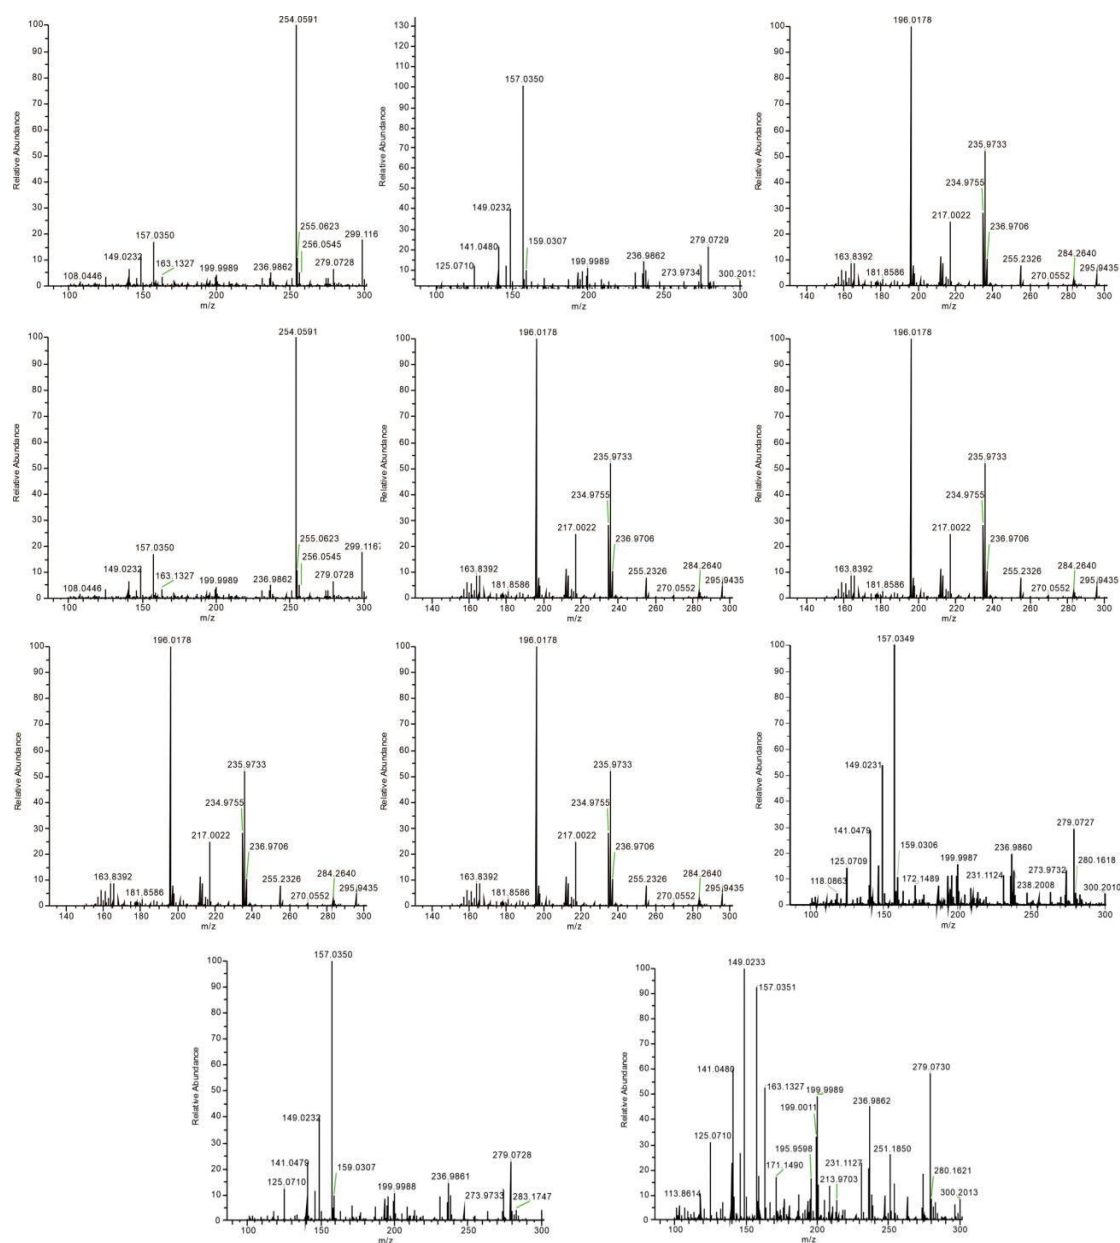

Figure S7. Liquid-mass diagram of SMX and its intermediates in photo-Fenton system.



**Table S1.** The chemical properties of HO-UIO-66/DE-0, HO-UIO-66/DE-300, HO-UIO-66/DE-400, and HO-UIO-66/DE-500.

| Element | HO-UIO-66<br>/DE-0 | HO-UIO-66<br>/DE-300 | HO-UIO-66<br>/DE-400 | HO-UIO-66<br>/DE-500 |
|---------|--------------------|----------------------|----------------------|----------------------|
| Si      | 39.80%             | 41.93%               | 42.08%               | 43.80%               |
| O       | 39.11%             | 37.87%               | 37.61%               | 36.77%               |
| N       | 14.18%             | 14.03%               | 13.85%               | 13.28%               |
| C       | 4.36%              | 4.31%                | 4.24%                | 4.11%                |
| Zr      | 1.45%              | 1.42%                | 1.41%                | 1.33%                |

**Table S2.** The structural information of the possible intermediate products.

| Compounds | Formula               | m/z | Proposed structure                                                                    |
|-----------|-----------------------|-----|---------------------------------------------------------------------------------------|
| SMX       | $C_{10}H_{11}N_3O_3S$ | 254 | 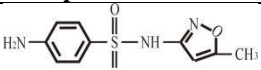   |
| SMX 1     | $C_{10}H_{13}N_3O_4S$ | 272 |    |
| SMX 2     | $C_{10}H_{11}N_3O_6S$ | 299 |    |
| SMX 3     | $C_{10}H_9N_3O_5S$    | 284 |    |
| SMX 4     | $C_6H_6N_2O_5S$       | 235 |    |
| SMX 5     | $C_6H_4N_2O_4S$       | 217 |    |
| SMX 6     | $C_4H_6N_2O_4S$       | 181 |    |
| SMX 7     | $C_4H_6N_2O_5S$       | 196 |   |
| SMX 8     | $C_4H_4NO_2$          | 113 |  |
| SMX 9     | $C_6H_8N_2O_2S$       | 172 |  |
| SMX 10    | $C_6H_7NO_2S$         | 156 |  |
